# Supplementary material
Source: publisher figshare collection journal article supplement (https://sage.figshare.com/ndownloader/files/15460208)
Supplement: Supplementary file 1 [file 15460208]

## Supplementary Figures

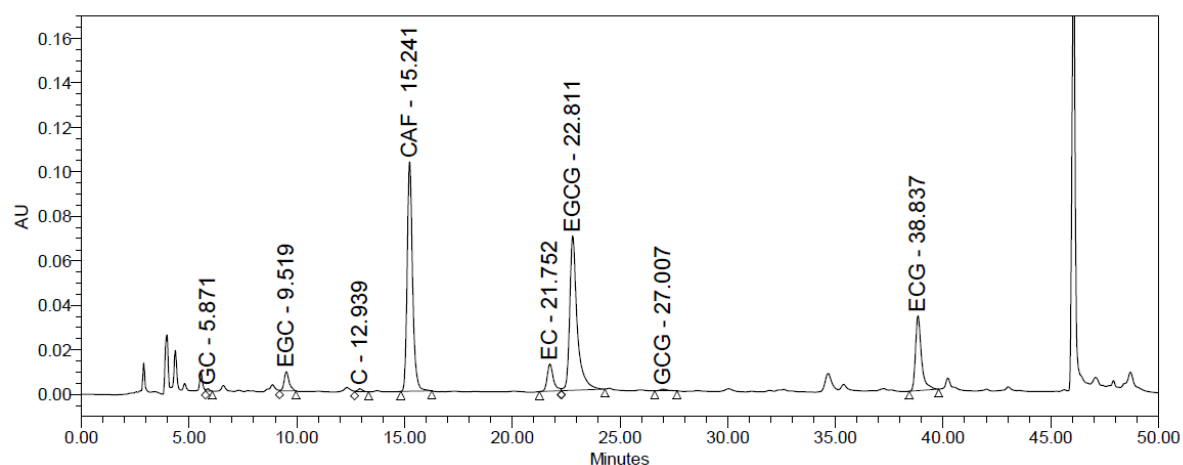

**Figure S1.** The chromatogram represents HPLC catechin analysis of green tea leaves extract. It is notable that much higher peaks of catechins were found in the middle of the separation from the HPLC chromatogram, suggesting that green tea leaves extract contain more EGCG and ECG compared to the GTP extract.

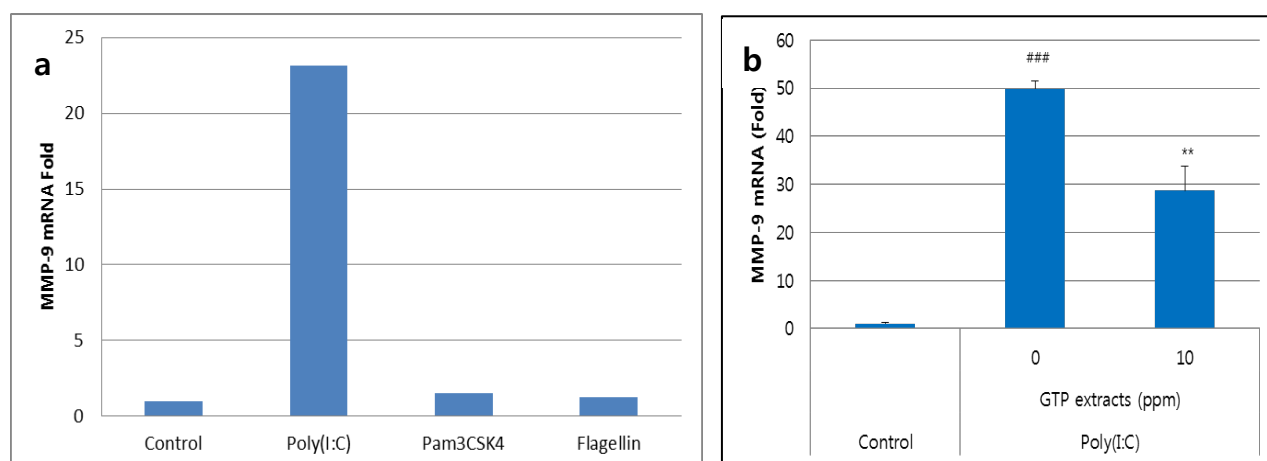

**Figure S2.** (a) Relative transcript level of MMP-9 was determined via real-time PCR, and plotted in relation to endogenous GAPDH levels. Human epidermal keratinocytes were incubated with Poly(I:C) (10  $\mu$ g/ml), Pam3CSK4 (1  $\mu$ g/ml), and Flagellin (100 ng/ml) for 24 h, respectively. (b) Human epidermal keratinocytes were treated with 10  $\mu$ g/ml GTP extract in the presence of 10  $\mu$ g/ml poly(I:C) for 24 h, and then used RT-PCR to assess the cellular mRNA level of MMP-9.
